# Supplementary material for: Functional Tea-Infused Set Yoghurt Development by Evaluation of Sensory Quality and Textural Properties
Source: MDPI journal article supplement (doi:10.3390/foods9121848), 2020-12-11
Supplement: s1 [file s1]

## Supplementary Materials

Table 1. Sensory attribute for yoghurts profiling, their definitions and intensity range.

| Attributes               | Definitions                                                                                      | Intensity range               |
|--------------------------|--------------------------------------------------------------------------------------------------|-------------------------------|
| <b>Odour</b>             |                                                                                                  |                               |
| Sweet                    | Basic odour quality - no definition required                                                     | none - very intensive         |
| Sour                     | Basic odour quality - no definition required                                                     | none - very intensive         |
| Yoghurt                  | Basic odour quality - no definition required                                                     | none - very intensive         |
| Milky                    | Odour of milk                                                                                    | none - very intensive         |
| Fat                      | Odour of fat milk                                                                                | none - very intensive         |
| Green tea                | Odour characteristic for the green tea                                                           | none - very intensive         |
| Black tea                | Odour characteristic for the black tea                                                           | none - very intensive         |
| Herbs                    | Odour characteristic for the herbs                                                               | none - very intensive         |
| Peach                    | Odour characteristic for the peach fruit                                                         | none - very intensive         |
| Citrus                   | Odour characteristic for the citrus fruits                                                       | none - very intensive         |
| Nectar                   | Odour characteristic for the nectar and flowers                                                  | none - very intensive         |
| <b>Visual attributes</b> |                                                                                                  |                               |
| Whey                     | Presence and amount of whey in the product's surface                                             | none - a lot of               |
| Shine                    | Shine of the surface                                                                             | mat - shiny                   |
| Colour                   | Colour intensity of the product                                                                  | light white - dark cream      |
| Smoothness               | Degree of smoothness in the product's surface (grainy/ smooth appearance)                        | rough - smooth                |
| Adhesiveness             | Perception of the product's density measured by the resistance of the spoon                      | thin - thick                  |
| Filling the teaspoon     | Way to fill a teaspoon                                                                           | flat - conical                |
| Consistency uniformity   | Perceived visually uniformity of the product                                                     | not uniform - uniform         |
| <b>Texture in mouth</b>  |                                                                                                  |                               |
| Thickness                | Perception of the product's density in the mouth                                                 | thin - thick                  |
| Melting                  | Degree of the product's melting in the mouth                                                     | much delayed - immediate      |
| Firmness                 | The degree of firmness of the product's consistency                                              | loose - firm                  |
| Yield stress             | The degree of viscosity of the sample                                                            | low viscosity- high viscosity |
| Fat film                 | Perception of the fatty film, coating the oral cavity with the fatty film                        | none - very intensive         |
| Creaminess               | Impression of creaminess connected with melting yoghurt in the mouth, in contrast to thin sample | thin - creamy                 |
| Smoothness               | Perception of smoothness in the mouth                                                            | rough - smooth                |
| <b>Basic taste</b>       |                                                                                                  |                               |
| Acid                     | Basic taste quality - no definition required                                                     | none - very intensive         |
| Sweet                    | Basic taste quality - no definition required                                                     | none - very intensive         |
| Bitter                   | Basic taste quality - no definition required                                                     | none - very intensive         |
| Astringent               | Perception of astringency in the mouth                                                           | none - very intensive         |
| <b>Flavour</b>           |                                                                                                  |                               |
| Milky                    | Flavour of milk                                                                                  | none - very intensive         |
| Yoghurt                  | Flavour of yoghurt                                                                               | none - very intensive         |
| Quark                    | Flavour of quark (fresh cheese)                                                                  | none - very intensive         |
| Green tea                | Flavour of infused green tea                                                                     | none - very intensive         |
| Black tea                | Flavour of infused black tea                                                                     | none - very intensive         |
| Herbs                    | Flavour of infused melissa                                                                       | none - very intensive         |
| Peach                    | Flavour of peach fruit                                                                           | none - very intensive         |
| Nectar                   | Flavour of nectar and flowers                                                                    | none - very intensive         |

|                        |                                                                                                 |                   |
|------------------------|-------------------------------------------------------------------------------------------------|-------------------|
| <b>Body</b>            | Harmonization of all positive attributes                                                        | incomplete – full |
| <b>Overall quality</b> | Overall impression of the harmony of positive attributes, with no or only slight negative notes | low–high          |

Table 2. Sensory characteristics of yoghurts evaluated by experts: C – Control, G – Green tea, B – Black tea, O – Oolong tea, M – Lemon balm- the mean values, 2 sessions (n=20).

|                             |                           | <b>C</b>         | <b>G</b>          | <b>B</b>          | <b>O</b>          | <b>M</b>          |
|-----------------------------|---------------------------|------------------|-------------------|-------------------|-------------------|-------------------|
| <b>odour</b>                | o. milky                  | 4.0 <sup>c</sup> | 3.5 <sup>bc</sup> | 3.4 <sup>bc</sup> | 2.8 <sup>ab</sup> | 2.0 <sup>a</sup>  |
|                             | o. yoghurt                | 4.7 <sup>c</sup> | 4.0 <sup>bc</sup> | 3.3 <sup>b</sup>  | 3.4 <sup>b</sup>  | 2.1 <sup>a</sup>  |
|                             | o. sour                   | 4.0 <sup>b</sup> | 2.8 <sup>a</sup>  | 2.7 <sup>a</sup>  | 2.6 <sup>a</sup>  | 2.2 <sup>a</sup>  |
|                             | o. sweet                  | 1.5 <sup>a</sup> | 2.2 <sup>ab</sup> | 2.7 <sup>b</sup>  | 2.9 <sup>b</sup>  | 1.5 <sup>a</sup>  |
|                             | o. fat                    | 3.0 <sup>b</sup> | 3.1 <sup>b</sup>  | 2.6 <sup>ab</sup> | 2.6 <sup>ab</sup> | 1.7 <sup>a</sup>  |
|                             | o. green tea              | 0.0 <sup>a</sup> | 2.5 <sup>c</sup>  | 0.2 <sup>a</sup>  | 0.5 <sup>a</sup>  | 1.6 <sup>b</sup>  |
|                             | o. black tea              | 0.0 <sup>a</sup> | 0.5 <sup>a</sup>  | 2.1 <sup>b</sup>  | 0.1 <sup>a</sup>  | 0.2 <sup>a</sup>  |
|                             | o. herbs                  | 0.0 <sup>a</sup> | 0.6 <sup>ab</sup> | 1.0 <sup>b</sup>  | 0.1 <sup>a</sup>  | 4.1 <sup>c</sup>  |
|                             | o. peach                  | 0.0 <sup>a</sup> | 2.1 <sup>bc</sup> | 3.1 <sup>c</sup>  | 4.4 <sup>d</sup>  | 1.3 <sup>b</sup>  |
|                             | o. citrus                 | 0.0 <sup>a</sup> | 0.9 <sup>b</sup>  | 0.8 <sup>b</sup>  | 1.4 <sup>b</sup>  | 1.0 <sup>b</sup>  |
|                             | o. nectar                 | 0.0 <sup>a</sup> | 1.5 <sup>b</sup>  | 1.7 <sup>b</sup>  | 2.1 <sup>b</sup>  | 1.3 <sup>b</sup>  |
| <b>appearance</b>           | whey                      | 1.9 <sup>a</sup> | 4.8 <sup>b</sup>  | 4.7 <sup>b</sup>  | 4.9 <sup>b</sup>  | 4.5 <sup>b</sup>  |
|                             | shine                     | 6.8              | 7.3               | 7.2               | 7.5               | 7.4               |
|                             | colour intensity          | 1.0 <sup>a</sup> | 4.3 <sup>c</sup>  | 5.2 <sup>cd</sup> | 3.2 <sup>b</sup>  | 5.8 <sup>d</sup>  |
|                             | visually smoothness       | 6.8              | 7.0               | 6.4               | 7.1               | 6.1               |
|                             | adhesiveness              | 6.0              | 6.2               | 6.6               | 6.9               | 6.5               |
|                             | filling the teaspoon      | 6.0              | 6.5               | 6.1               | 6.8               | 6.6               |
|                             | uniformity of consistency | 6.4              | 5.2               | 5.3               | 6.4               | 5.6               |
| <b>texture in the mouth</b> | thickness in the mouth    | 5.3              | 5.6               | 5.1               | 5.1               | 5.4               |
|                             | melting                   | 6.7              | 6.5               | 6.4               | 6.4               | 7.2               |
|                             | firmness                  | 5.3              | 5.3               | 5.4               | 5.8               | 5.6               |
|                             | yield stress              | 2.1              | 2.7               | 2.7               | 2.5               | 2.4               |
|                             | fat film                  | 2.0              | 2.3               | 2.0               | 2.2               | 2.1               |
|                             | creaminess                | 4.2              | 4.4               | 3.9               | 5.2               | 4.7               |
|                             | smoothness in the mouth   | 6.7              | 6.2               | 6.2               | 6.8               | 6.7               |
| <b>taste /flavour</b>       | t. sour                   | 5.8              | 5.0               | 5.1               | 4.9               | 4.5               |
|                             | t. sweet                  | 1.0              | 1.1               | 1.2               | 1.7               | 0.9               |
|                             | t. bitter                 | 0.8              | 2.1               | 1.7               | 1.5               | 2.0               |
|                             | t. astringent             | 2.0              | 2.1               | 2.3               | 2.5               | 2.2               |
|                             | f. milky                  | 3.3 <sup>b</sup> | 1.9 <sup>a</sup>  | 1.9 <sup>a</sup>  | 2.1 <sup>a</sup>  | 1.6 <sup>a</sup>  |
|                             | f. yoghurt                | 5.1 <sup>b</sup> | 3.3 <sup>a</sup>  | 3.0 <sup>a</sup>  | 3.3 <sup>a</sup>  | 2.8 <sup>a</sup>  |
|                             | f. quark                  | 2.5              | 1.5               | 2.2               | 1.4               | 1.3               |
|                             | f. green tea              | 0.0 <sup>a</sup> | 3.5 <sup>d</sup>  | 1.3 <sup>ab</sup> | 0.9 <sup>b</sup>  | 2.3 <sup>c</sup>  |
|                             | f. black tea              | 0.0 <sup>a</sup> | 0.4 <sup>a</sup>  | 1.7 <sup>b</sup>  | 0.1 <sup>a</sup>  | 0.3 <sup>a</sup>  |
|                             | f. herbs                  | 0.0 <sup>a</sup> | 0.9 <sup>b</sup>  | 0.9 <sup>b</sup>  | 0.5 <sup>ab</sup> | 4.6 <sup>c</sup>  |
|                             | f. peach                  | 0.0 <sup>a</sup> | 1.4 <sup>b</sup>  | 1.7 <sup>b</sup>  | 3.8 <sup>c</sup>  | 0.9 <sup>b</sup>  |
|                             | f. nectar                 | 0.0 <sup>a</sup> | 1.0 <sup>b</sup>  | 0.7 <sup>b</sup>  | 1.5 <sup>b</sup>  | 0.9 <sup>b</sup>  |
| <b>body</b>                 | body                      | 5.1 <sup>c</sup> | 3.8 <sup>a</sup>  | 3.9 <sup>ab</sup> | 5.0 <sup>bc</sup> | 3.9 <sup>ab</sup> |
| <b>quality</b>              | overall quality           | 5.9 <sup>c</sup> | 4.5 <sup>ab</sup> | 4.4 <sup>ab</sup> | 5.6 <sup>bc</sup> | 4.0 <sup>a</sup>  |

Mean values marked with different indices a, b, c, d differ statistically ( $p \leq 0.05$ ).

Table 3. Acceptability of yoghurts and willingness to buy evaluated by consumers: C – Control, G – Green tea, B – Black tea, O – Oolong tea, M – Lemon balm- the mean values (n=30).

|                       | C                 | G                | B                | O                | M                 |
|-----------------------|-------------------|------------------|------------------|------------------|-------------------|
| appearance            | 6.6 <sup>b</sup>  | 3.8 <sup>a</sup> | 4.3 <sup>a</sup> | 6.5 <sup>b</sup> | 5.9 <sup>b</sup>  |
| odour                 | 6.2 <sup>b</sup>  | 4.4 <sup>a</sup> | 4.4 <sup>a</sup> | 7.0 <sup>b</sup> | 4.8 <sup>a</sup>  |
| consistency           | 5.9 <sup>bc</sup> | 4.4 <sup>a</sup> | 4.7 <sup>a</sup> | 6.3 <sup>c</sup> | 5.2 <sup>ab</sup> |
| flavour               | 5.0 <sup>c</sup>  | 2.6 <sup>a</sup> | 3.7 <sup>b</sup> | 6.1 <sup>d</sup> | 3.3 <sup>ab</sup> |
| overall acceptability | 5.7 <sup>b</sup>  | 3.0 <sup>a</sup> | 3.7 <sup>a</sup> | 5.9 <sup>b</sup> | 3.8 <sup>a</sup>  |
| willingness to buy    | 5.3 <sup>b</sup>  | 2.3 <sup>a</sup> | 3.2 <sup>a</sup> | 5.6 <sup>b</sup> | 3.3 <sup>a</sup>  |

Mean values marked with different indices a, b, c, d differ statistically ( $p \leq 0.05$ ).
